# Supplementary figures and images for: C6-ceramide synergistically potentiates the anti-tumor effects of histone deacetylase inhibitors via AKT dephosphorylation and α-tubulin hyperacetylation both in vitro and in vivo
Source: PubMed Central journal article supplement — Cell Death Dis. 2011 Jan 27;2(1):e117–. doi: 10.1038/cddis.2010.96 (PMC3077291; doi:10.1038/cddis.2010.96), 2011-01-27

**Fig. S1**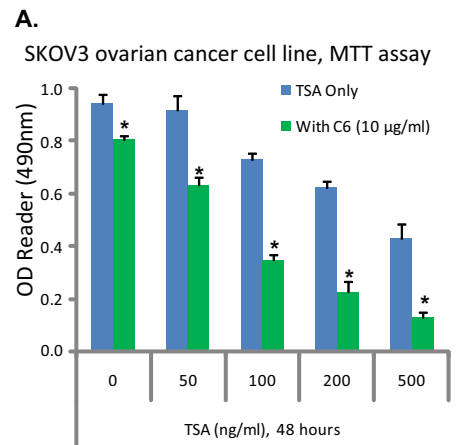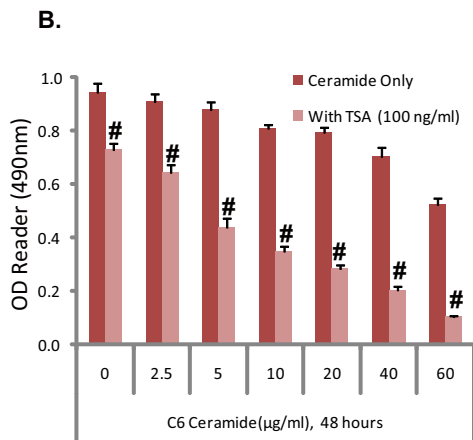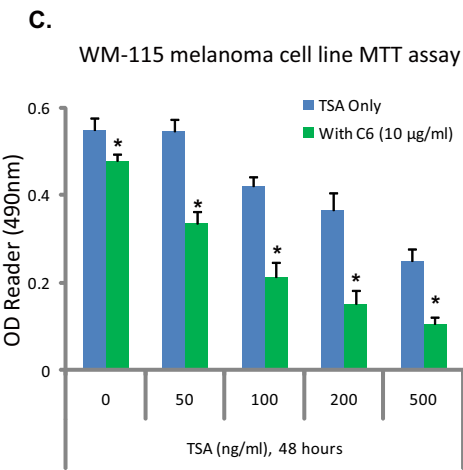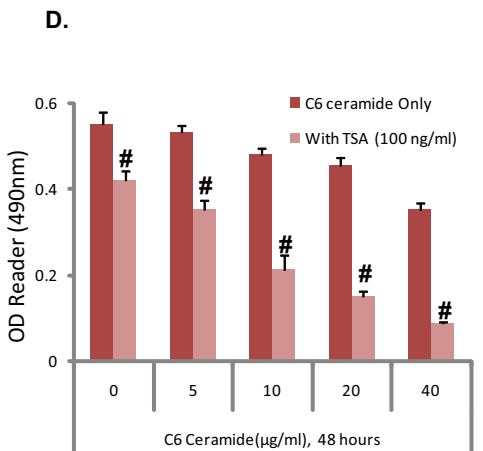

Supplement: cddis201096x1.pdf [file cddis201096x1.pdf]

Fig. S2

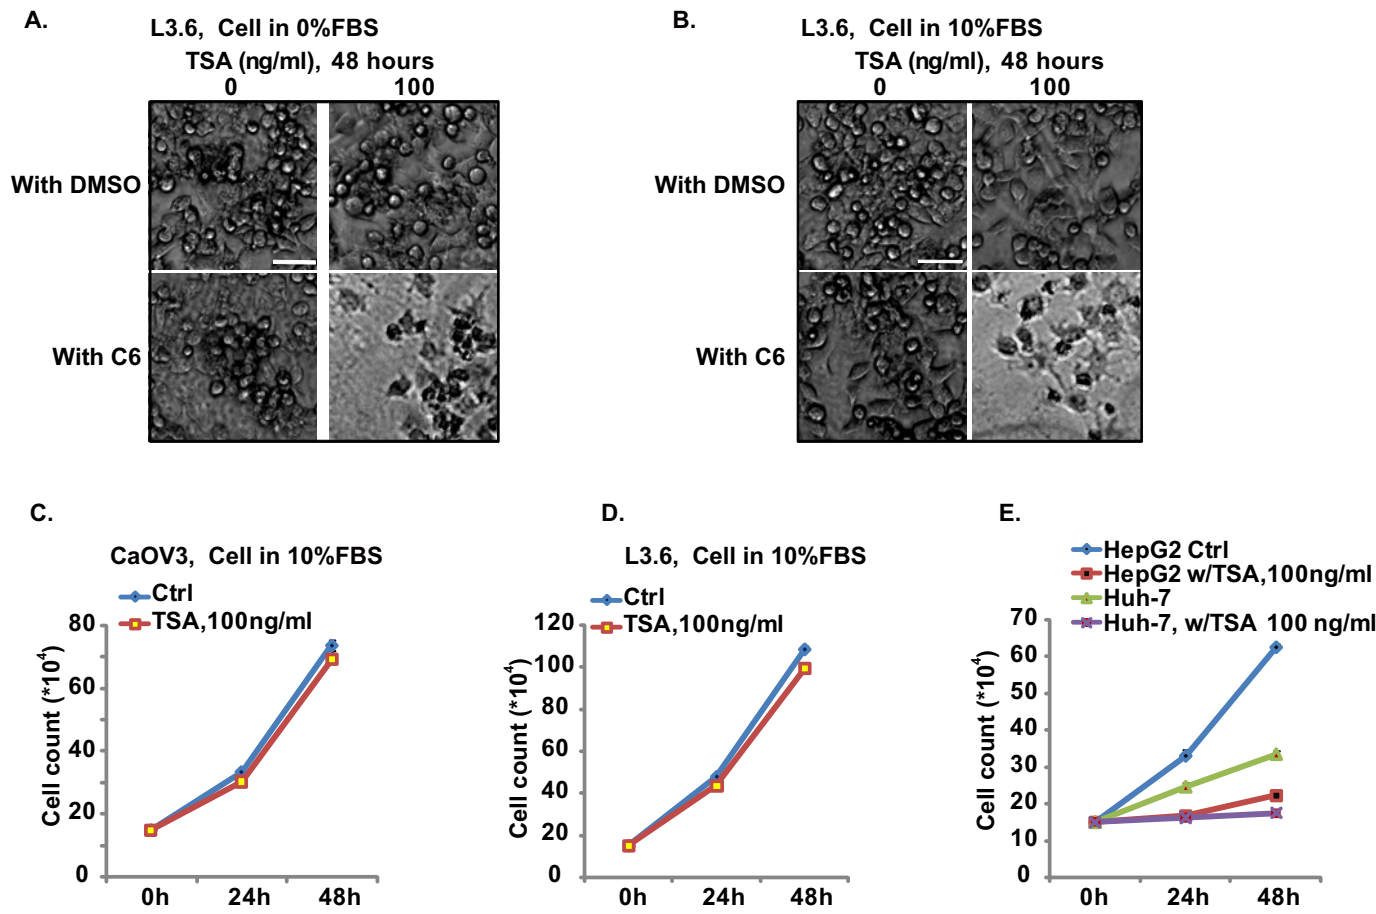

Supplement: cddis201096x2.pdf [file cddis201096x2.pdf]

**Fig. S3****A.****L3.6**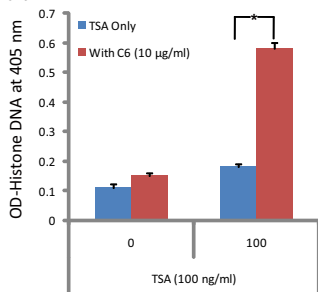**B.****L3.6**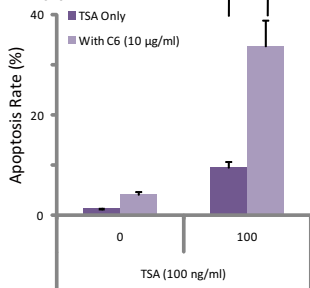**C.****SKOV3**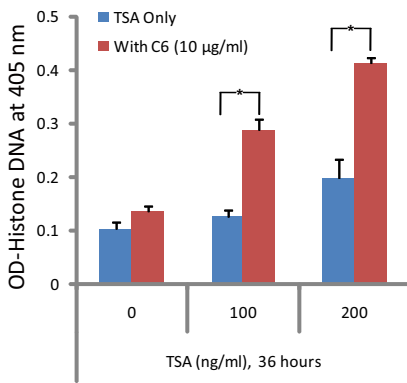**D.****SKOV3**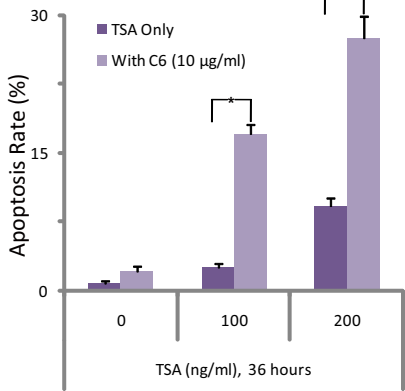

Supplement: cddis201096x3.pdf [file cddis201096x3.pdf]

**Fig. S4**

**A.**

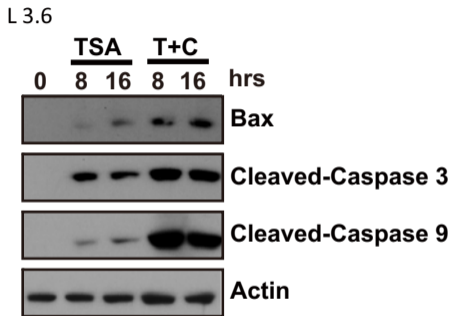

**B.**

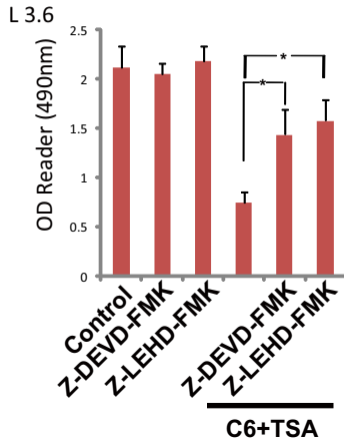

Supplement: cddis201096x4.pdf [file cddis201096x4.pdf]

**Fig. S5**

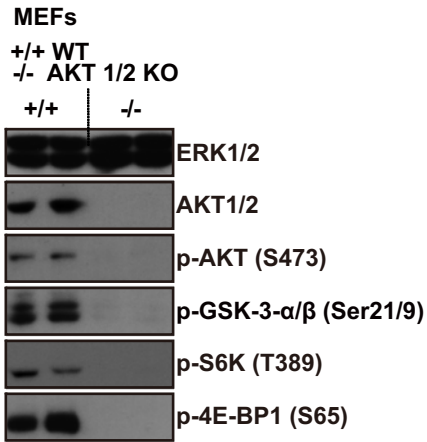

Supplement: cddis201096x5.pdf [file cddis201096x5.pdf]

Fig. S6

A. L3.6:

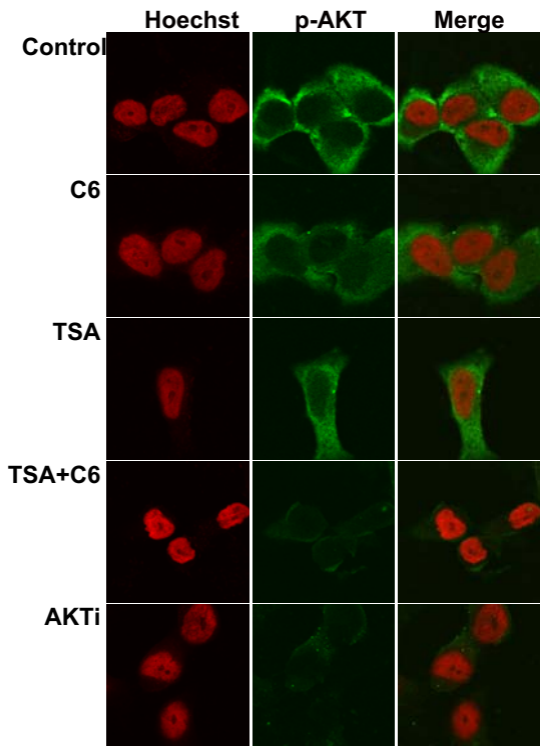

Supplement: cddis201096x6.pdf [file cddis201096x6.pdf]
